# Supplementary material for: The Role of Artificial Intelligence Model Documentation in Translational Science: Scoping Review
Source: PubMed Central journal article supplement (PMC10382950; doi:10.2196/45903), 2023-07-14
Supplement: ijmr_v12i1e45903_app1.pdf [file ijmr_v12i1e45903_app1.pdf]

| Key Concept                                | Keywords                                                                                            | MeSH Terms                                                                                                | Key Concept Search Query                                                                                                                                                                                                                                            |
|--------------------------------------------|-----------------------------------------------------------------------------------------------------|-----------------------------------------------------------------------------------------------------------|---------------------------------------------------------------------------------------------------------------------------------------------------------------------------------------------------------------------------------------------------------------------|
| Artificial Intelligence / Machine Learning | Artificial intelligence, machine learning                                                           | "Artificial Intelligence"[Mesh] OR "Machine Learning"[Mesh] OR "Decision Support Systems, Clinical"[Mesh] | "artificial intelligence"[Text Word] OR "machine learning"[Text Word] OR "Artificial Intelligence"[Mesh] OR "Machine Learning"[Mesh] OR "Decision Support Systems, Clinical"[Mesh]                                                                                  |
| Ethical Considerations                     | Explainability, interpretability, governance, documentation, translation, translational informatics | "Clinical Governance"[Mesh] OR "Documentation"[Mesh] OR "Standard of Care"[Mesh]                          | explainability[Text Word] OR interpretability[Text Word] OR governance[Text Word] OR documentation[Text Word] OR translat*[Text Word] OR "translational informatics"[Text Word] OR "Clinical Governance"[Mesh] OR "Documentation"[Mesh] OR "Standard of Care"[Mesh] |
| Explainability                             | ethical consideration*, ethic(s), bias(es), algorithmic bias                                        | "Ethical Analysis"[Mesh] OR "Ethics, Clinical"[Mesh] OR "Selection Bias"[Mesh]                            | ethical consideration*[Text Word] OR ethic*[Text Word] OR bias*[Text Word] OR "algorithm bias"[Text Word] OR "Ethical Analysis"[Mesh] OR "Ethics, Clinical"[Mesh] OR "Selection Bias"[Mesh]                                                                         |

|          | Search Limitation                                                                         | Query                                                                                                                                                                                                                                                                                                                                                                                                                                                                                                                                                                                                                                                                                                                                                         |
|----------|-------------------------------------------------------------------------------------------|---------------------------------------------------------------------------------------------------------------------------------------------------------------------------------------------------------------------------------------------------------------------------------------------------------------------------------------------------------------------------------------------------------------------------------------------------------------------------------------------------------------------------------------------------------------------------------------------------------------------------------------------------------------------------------------------------------------------------------------------------------------|
| Database | PubMed                                                                                    |                                                                                                                                                                                                                                                                                                                                                                                                                                                                                                                                                                                                                                                                                                                                                               |
| Date     | Publication after 2015                                                                    | 2015/01/01:2022/2/1[Date - Publication]                                                                                                                                                                                                                                                                                                                                                                                                                                                                                                                                                                                                                                                                                                                       |
| Journal  | Journals identified to be relevant to the study objectives as defined by Jane (cite Jane) | (Nature medicine"[Journal] OR "J Am Med Inform Assoc."[Journal] OR "PLoS One"[jour] OR "BMJ Open"[Journal] OR "Bull World Health Organ"[jour] OR "IEEE Trans Vis Comput Graph"[Journal] OR "Bioethics"[Journal] OR "J Oral Biol Craniofac Res"[Journal] OR "BMC Med Inform Decis Mak"[Journal] OR "JMIR Med Inform"[Journal] OR "J Med Internet Res"[Journal] OR "Stud Health Technol Inform"[Journal] OR "J Am Coll Radiol"[Journal] OR "Yearb Med Inform"[Journal] OR "Artif Intell Med"[Journal] OR "Clin Radiol"[Journal] OR "Comput Biol Med"[Journal] OR "Comput Methods Programs Biomed"[Journal] OR "Int J Med Inform"[Journal] OR "Sci Eng Ethics"[Journal] OR "Implement Sci"[Journal] OR "J Med Ethics"[Journal] OR "Comput Inform Nurs"[Journal]) |

| Full PubMed Search Query:                                                                                                                                                                                                                                                                                                                                                                                                                                                                                                                                                                                                                                                                                                                                                                                                                                                                                                                                                                                                                                                                                                                                                                                                                                                                                                                                                                                                                                                        |
|----------------------------------------------------------------------------------------------------------------------------------------------------------------------------------------------------------------------------------------------------------------------------------------------------------------------------------------------------------------------------------------------------------------------------------------------------------------------------------------------------------------------------------------------------------------------------------------------------------------------------------------------------------------------------------------------------------------------------------------------------------------------------------------------------------------------------------------------------------------------------------------------------------------------------------------------------------------------------------------------------------------------------------------------------------------------------------------------------------------------------------------------------------------------------------------------------------------------------------------------------------------------------------------------------------------------------------------------------------------------------------------------------------------------------------------------------------------------------------|
| ("Artificial Intelligence"[Mesh] OR "Machine Learning"[Mesh] OR "Decision Support Systems, Clinical"[Mesh] OR "artificial intelligence"[Text Word] OR "machine learning"[Text Word]) AND ("Clinical Governance"[Mesh] OR "Documentation"[Mesh] OR "Standard of Care"[Mesh] OR explainability[Text Word] OR interpretability[Text Word] OR governance[Text Word] OR documentation[Text Word] OR translat*[Text Word] OR "translational informatics"[Text Word]) AND ("Ethical Analysis"[Mesh] OR "Ethics, Clinical"[Mesh] OR "Selection Bias"[Mesh] OR ethical consideration*[Text Word] OR ethic*[Text Word] OR bias*[Text Word] OR "algorithm bias"[Text Word]) AND (2015/01/01:2022/2/1[Date - Publication]) AND (Nature medicine"[Journal] OR "J Am Med Inform Assoc."[Journal] OR "PLoS One"[jour] OR "BMJ Open"[Journal] OR "Bull World Health Organ"[jour] OR "IEEE Trans Vis Comput Graph"[Journal] OR "Bioethics"[Journal] OR "J Oral Biol Craniofac Res"[Journal] OR "BMC Med Inform Decis Mak"[Journal] OR "JMIR Med Inform"[Journal] OR "J Med Internet Res"[Journal] OR "Stud Health Technol Inform"[Journal] OR "J Am Coll Radiol"[Journal] OR "Yearb Med Inform"[Journal] OR "Artif Intell Med"[Journal] OR "Clin Radiol"[Journal] OR "Comput Biol Med"[Journal] OR "Comput Methods Programs Biomed"[Journal] OR "Int J Med Inform"[Journal] OR "Sci Eng Ethics"[Journal] OR "Implement Sci"[Journal] OR "J Med Ethics"[Journal] OR "Comput Inform Nurs"[Journal]) |
