# Supplementary material for: The Role of Artificial Intelligence Model Documentation in Translational Science: Scoping Review
Source: PubMed Central journal article supplement (PMC10382950; doi:10.2196/45903), 2023-07-14
Supplement: ijmr_v12i1e45903_app2.pdf [file ijmr_v12i1e45903_app2.pdf]

| <b>Data Extraction Template (developed in Covidence)</b> |                                                                                                                |
|----------------------------------------------------------|----------------------------------------------------------------------------------------------------------------|
| <b>General Information of Publication</b>                | Title                                                                                                          |
|                                                          | Authors                                                                                                        |
|                                                          | Year                                                                                                           |
|                                                          | Country                                                                                                        |
| <b>Publication Characteristics</b>                       | Study design                                                                                                   |
|                                                          | Topics included (AI/ML, Documentation, Governance, Ethical considerations, Explainability, and/or Translation) |
|                                                          | Objective of publication                                                                                       |
|                                                          | Key words                                                                                                      |
| <b>Research Objective Specific Information</b>           | Present challenges in AI/ML                                                                                    |
|                                                          | Ethical considerations (Identified gaps and barriers / Recommendations)                                        |
|                                                          | Explainability (Identified gaps and barriers / Recommendations)                                                |
|                                                          | Standards, regulations, best practices, or governance strategies mentioned                                     |
|                                                          | Overall recommendations from paper                                                                             |
|                                                          | Relevant quotes                                                                                                |
| Additional relevant information                          |                                                                                                                |
